# Supplementary material for: Structural basis of Plasmodium vivax inhibition by antibodies binding to the circumsporozoite protein repeats
Source: eLife. 2022 Jan 13;11:e72908. doi: 10.7554/eLife.72908 (PMC8809896; doi:10.7554/eLife.72908)
Supplement: Supplementary file 2. — No intramolecular H-bonds were detected for peptide 247-4. [file elife-72908-supp2.docx]

**Supplementary File 2**. Intramolecular H-bonds (3.0 Å cut-off) in PvCSP peptides observed in Fab-peptide co-crystal structures. No intramolecular H-bonds were detected for peptide 247-4.

| **210-1** | **210-2** | **210-3** | **210-4** | **210-5** | **247-2** | **247-3** |
| --- | --- | --- | --- | --- | --- | --- |
| Gln7O – Gly10N | Gln7O – Gly10N | Gln7O – Gly10N | Gln7O – Gly10N | Gln7O – Gly10N | Gly3O – Gly5N | Pro8O – Ala13N |
| Pro8O – Asp11N | Pro8O – Asp11N | Pro8O – Asp11N | Pro8O – Asp11N | Pro8O – Asp11N | Ala10O – Gly12N |  |
| Asp11O – Asp14N |  |  | Asp11O – Asp14N |  | Ala13O – Gln16N |  |
| Asp11O – Gly15N |  |  | Asp11O – Gly15N |  |  |  |
