# Supplementary figures and images for: Structural basis of Plasmodium vivax inhibition by antibodies binding to the circumsporozoite protein repeats
Source: eLife journal article supplement (doi:10.7554/elife.72908), 2022-01-13

A

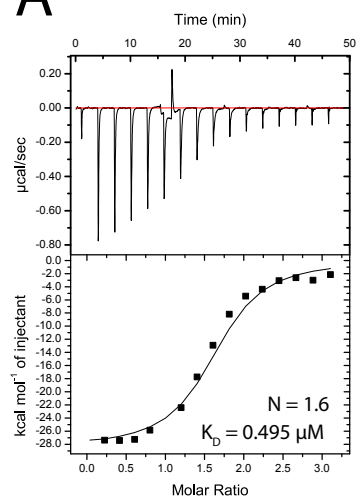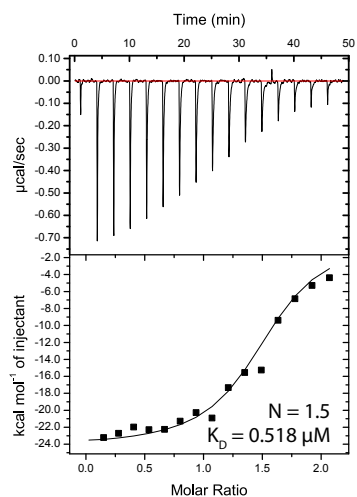

B

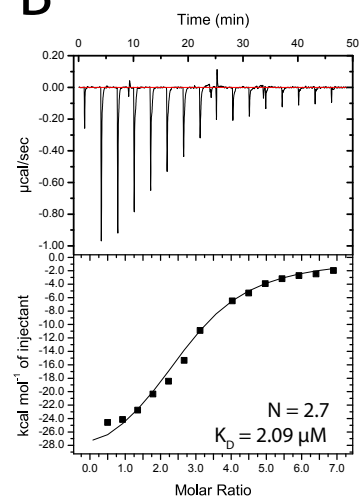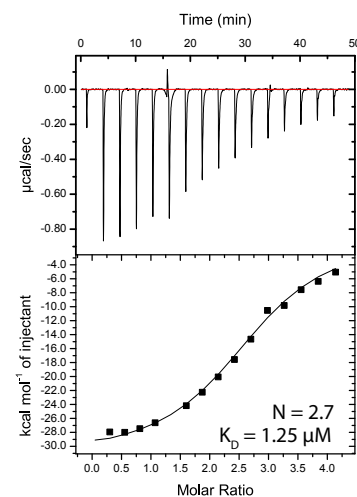

C

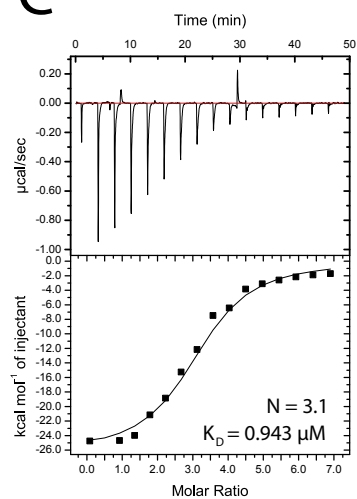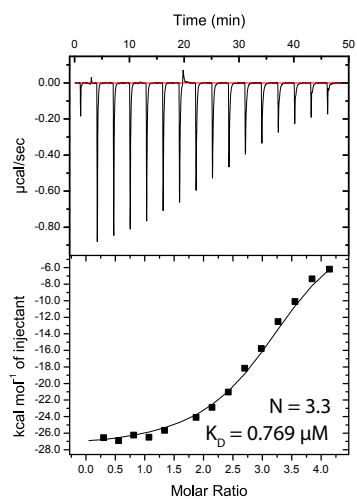

D

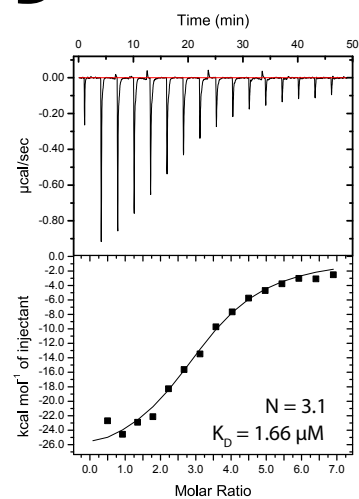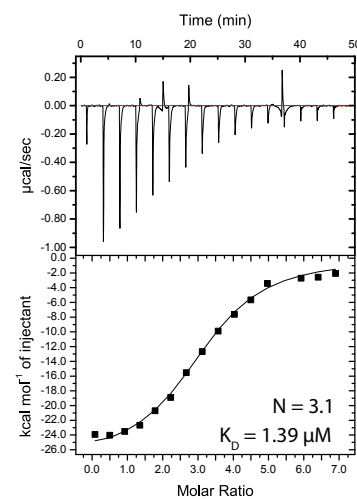

Supplement: supp [file elife-72908-supp-v1.zip]

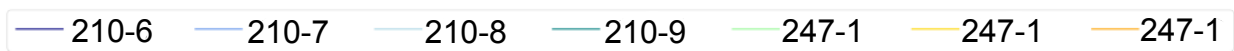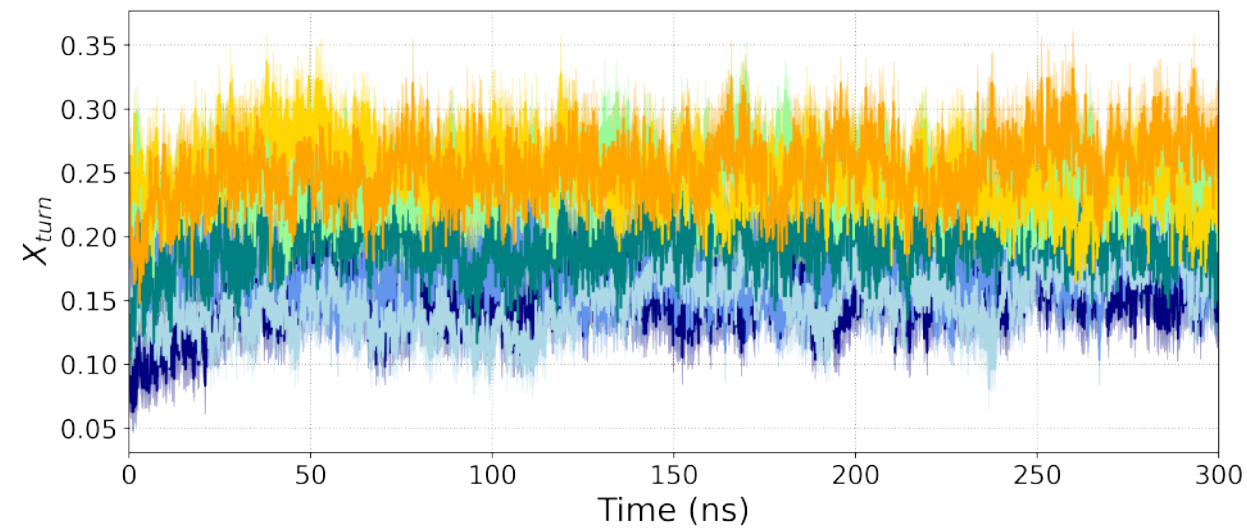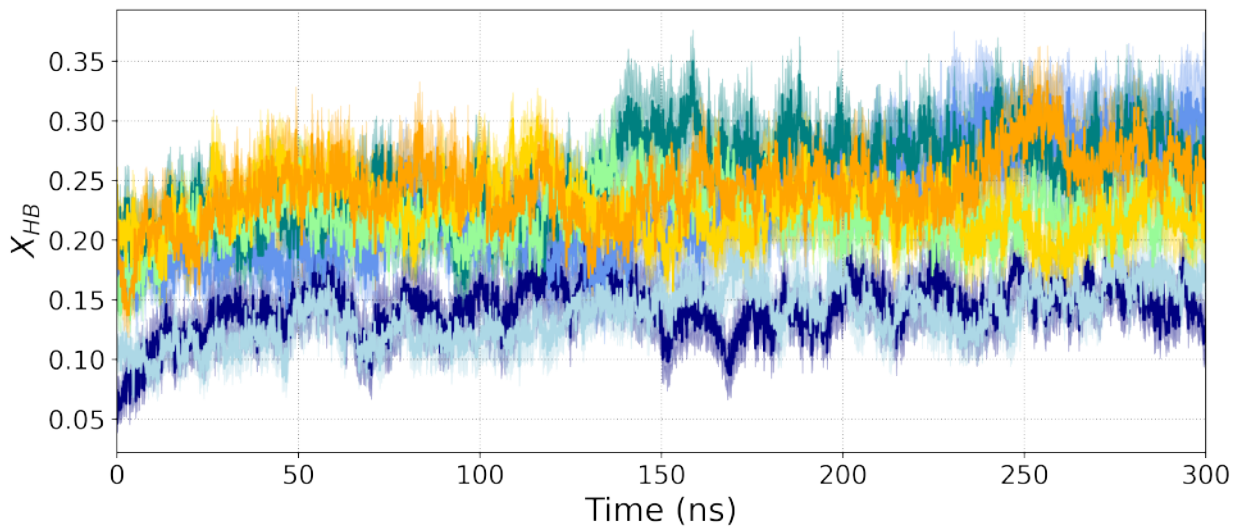

Supplement: supp [file elife-72908-supp-v1.zip]

Donor Residue

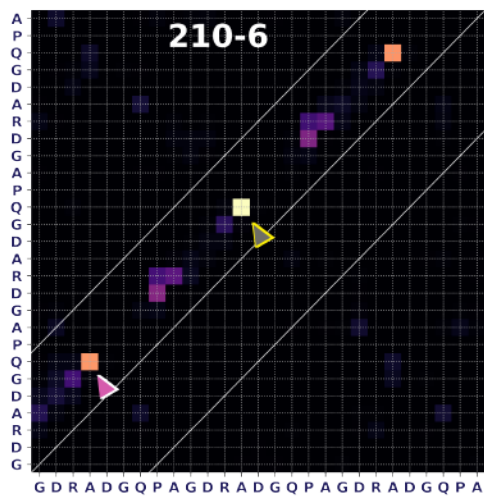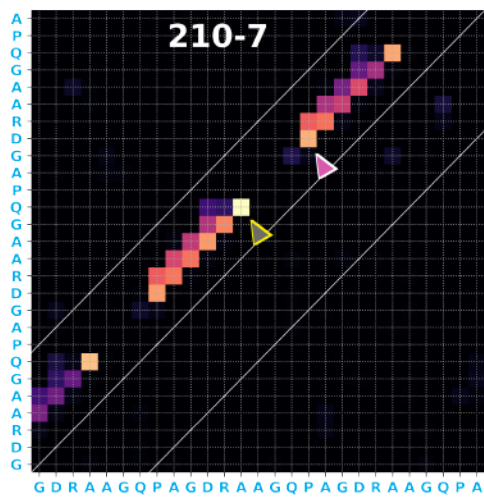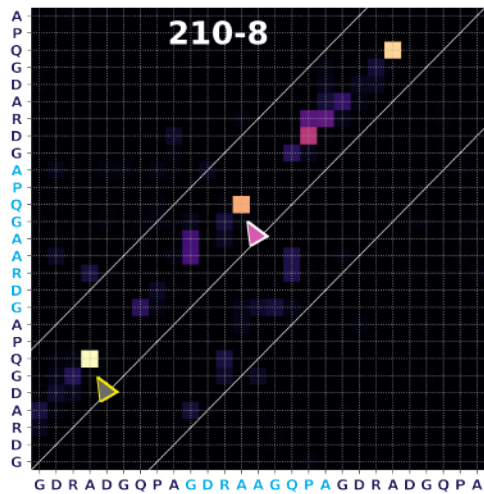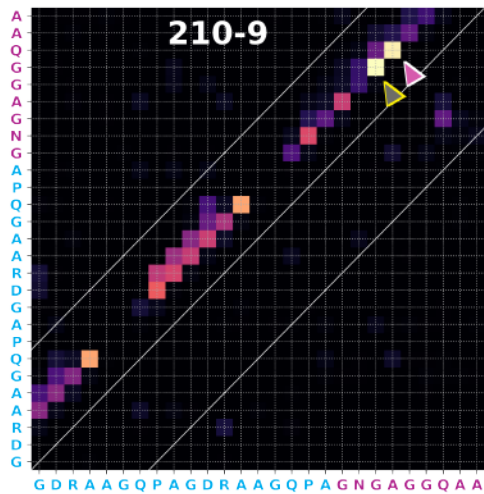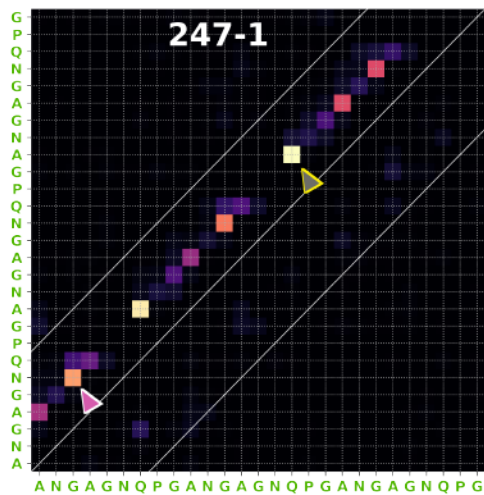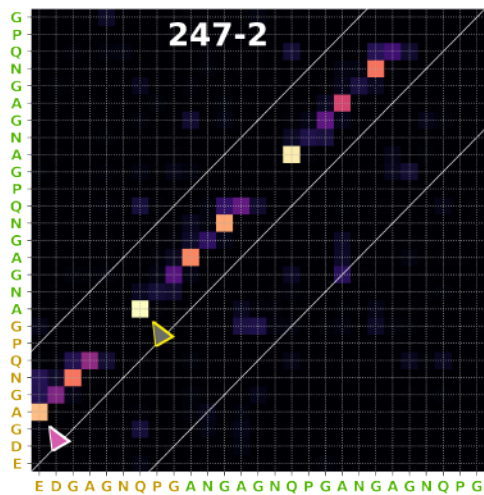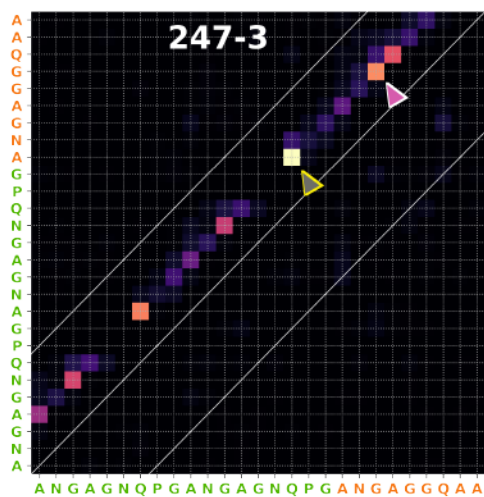

Acceptor Residue

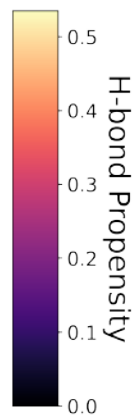

Supplement: supp [file elife-72908-supp-v1.zip]

A

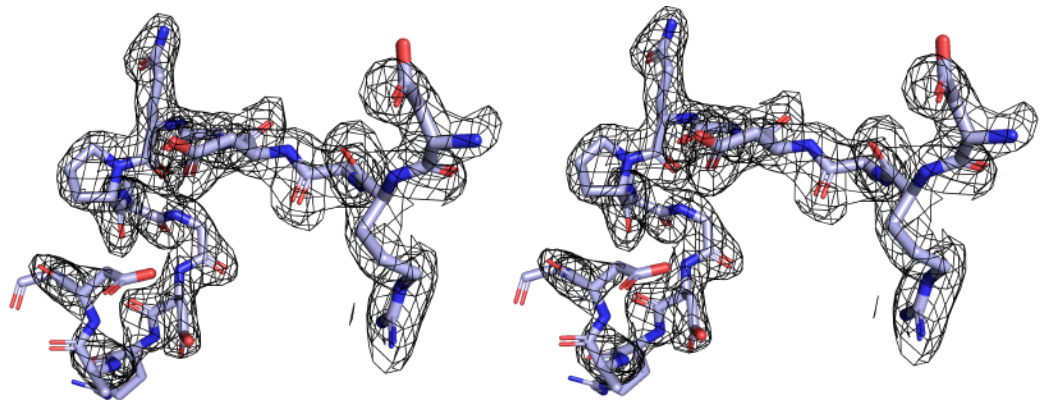

B

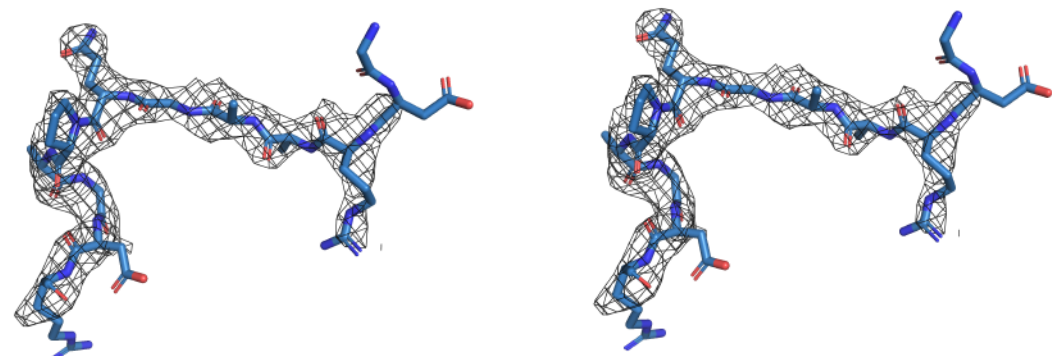

C

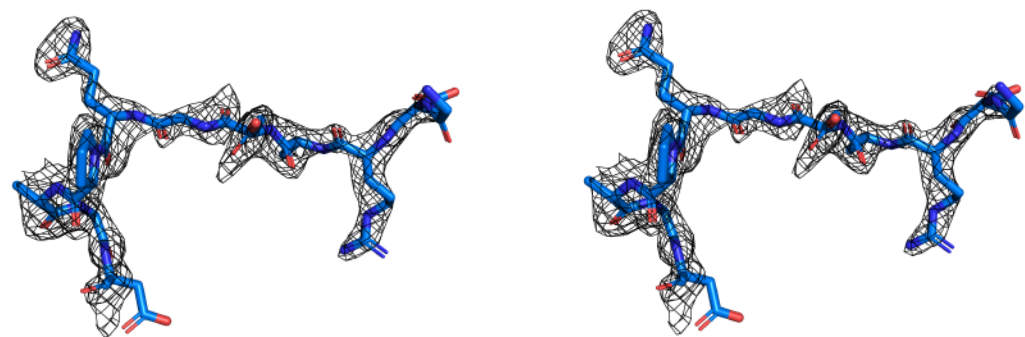

D

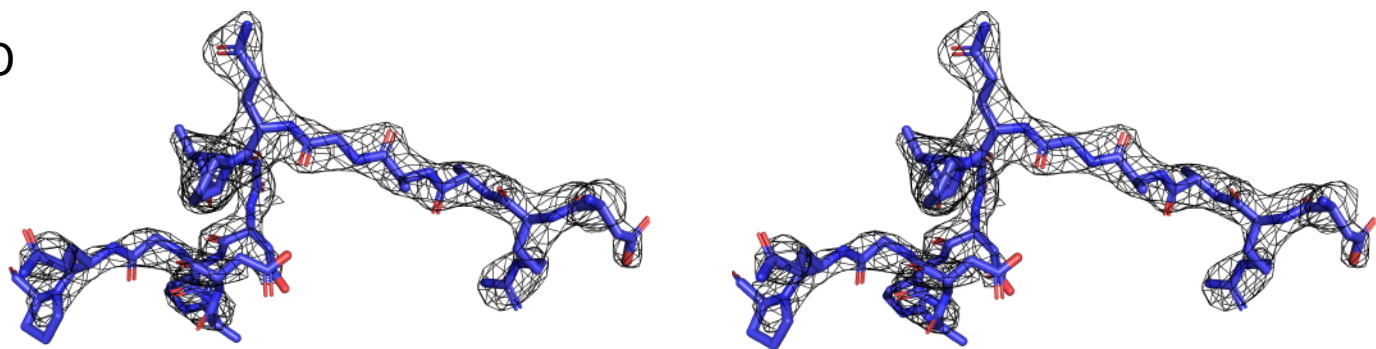

E

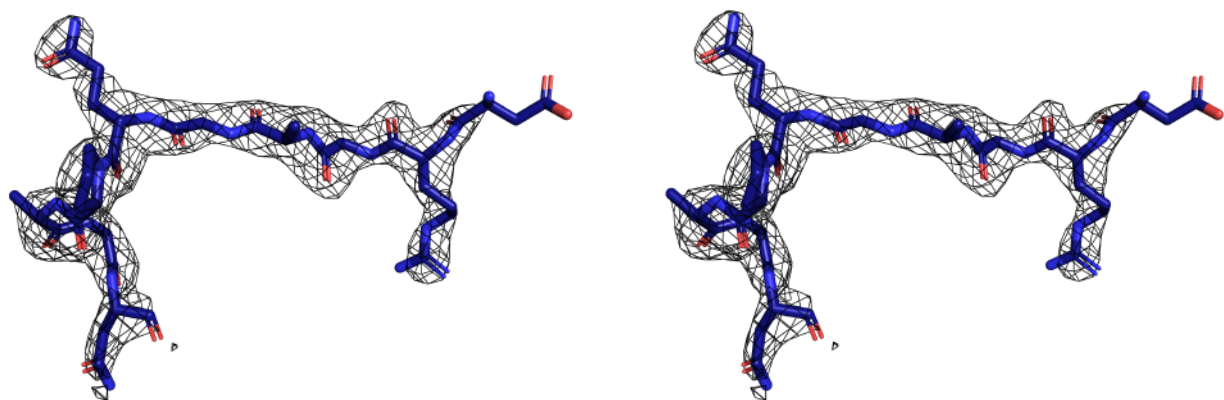

Supplement: supp [file elife-72908-supp-v1.zip]

A  
2E10.E9 Fab-PvCSPvk247

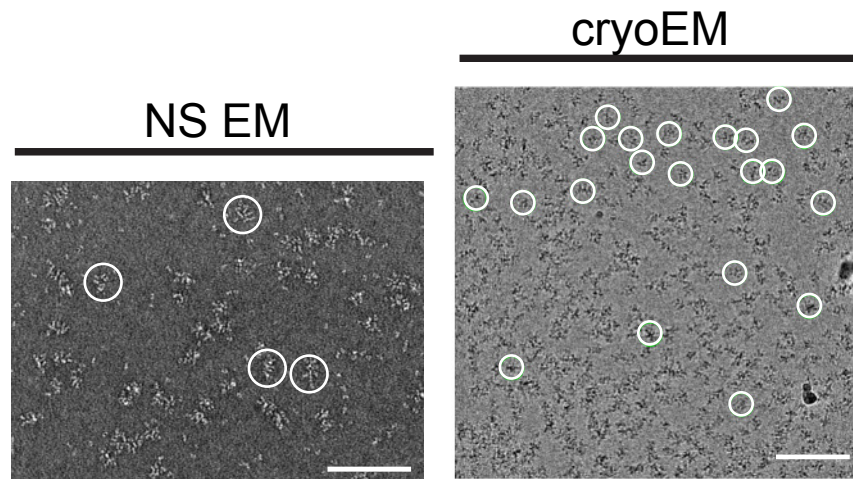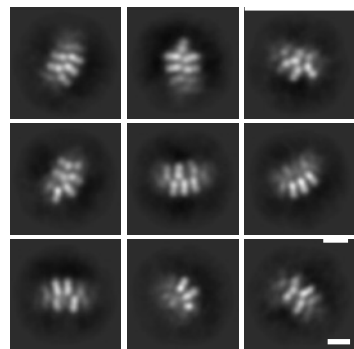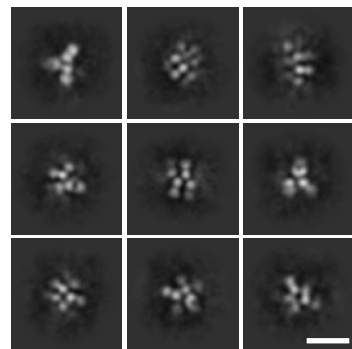

B  
2F2 Fab-PvCSPvk210

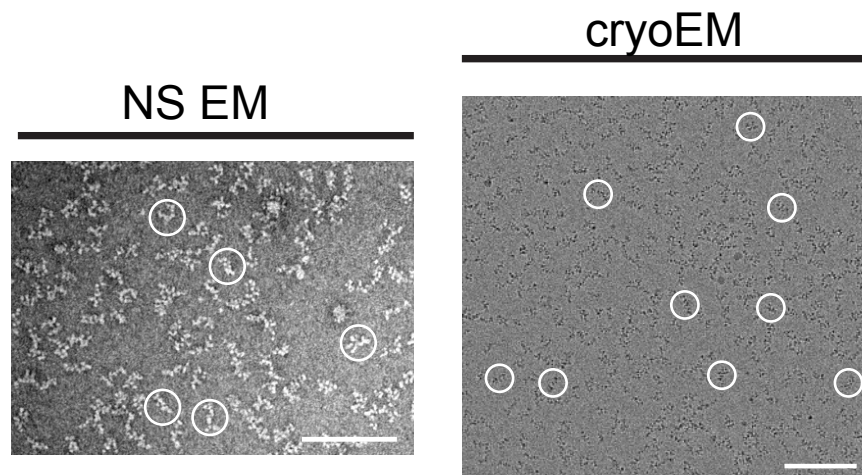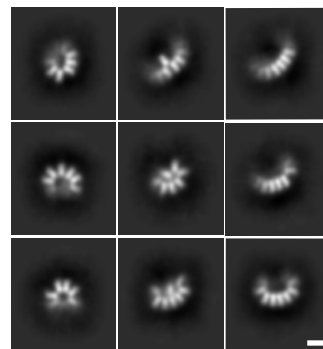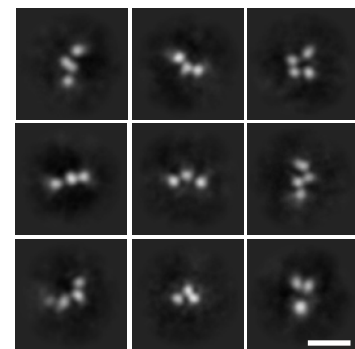

Supplement: supp [file elife-72908-supp-v1.zip]

A

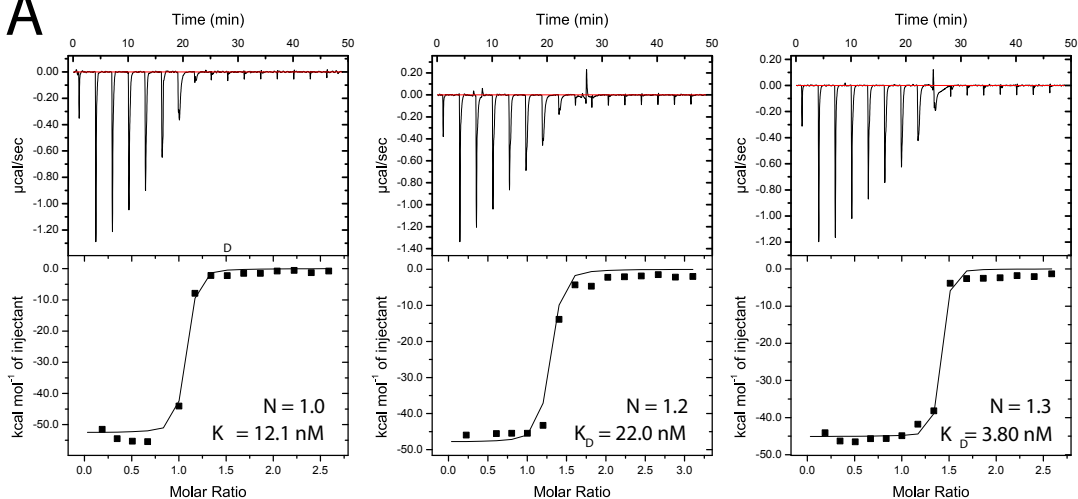

B

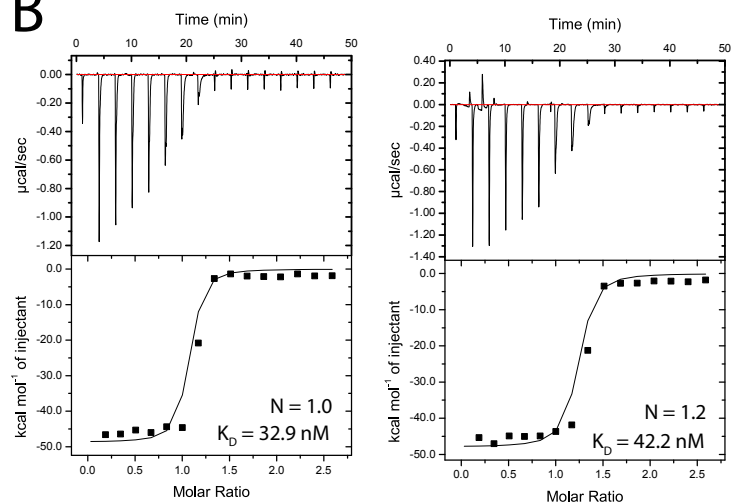

C

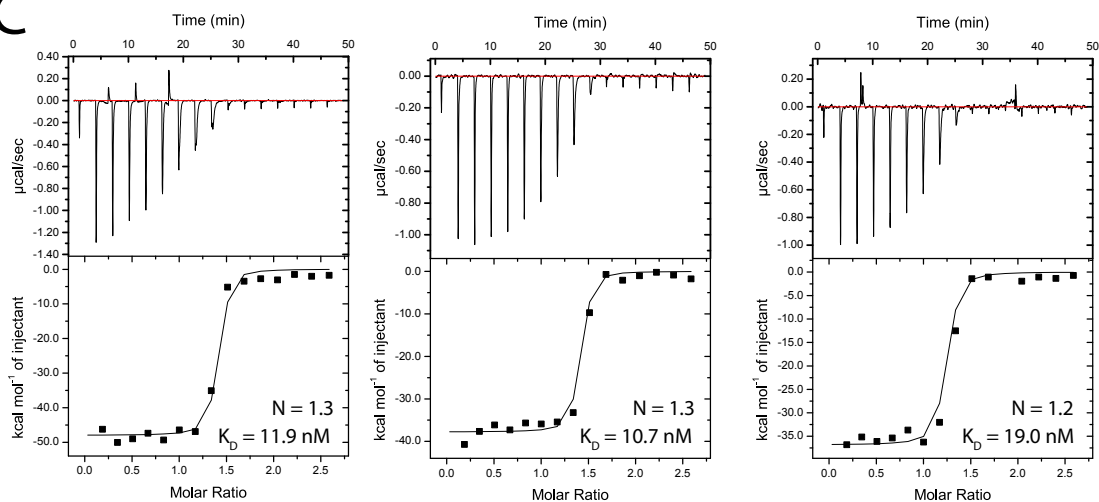

D

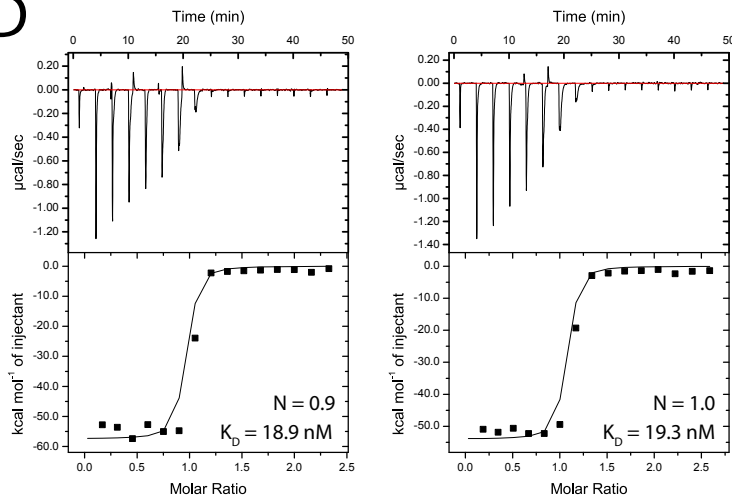

E

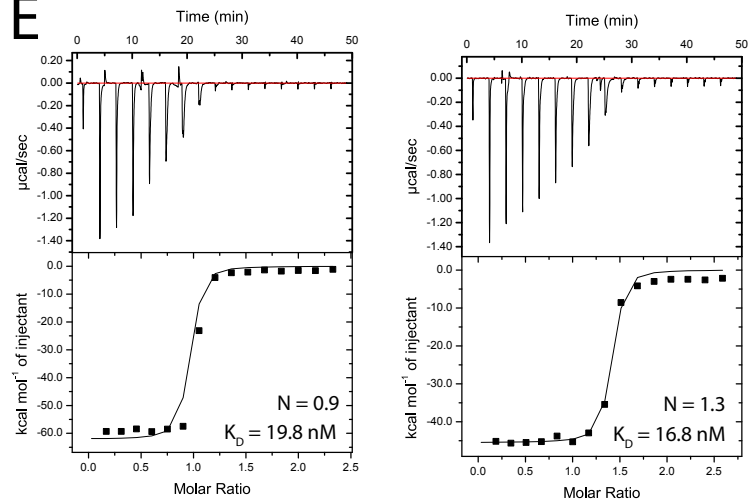

Supplement: supp [file elife-72908-supp-v1.zip]

A

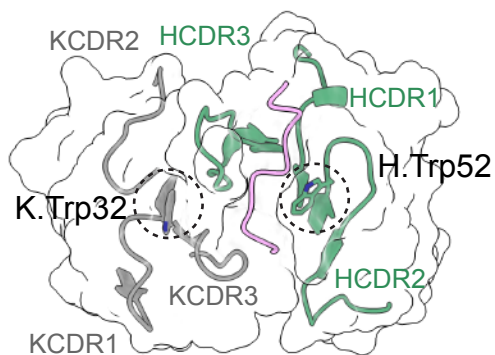

B

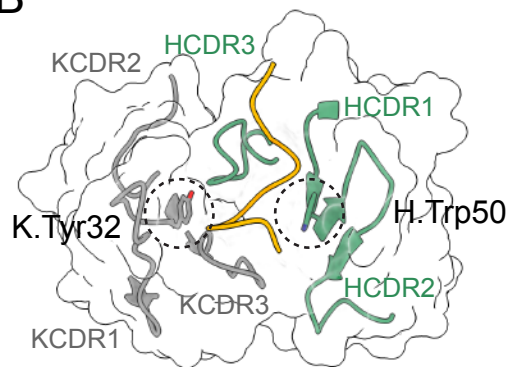

C

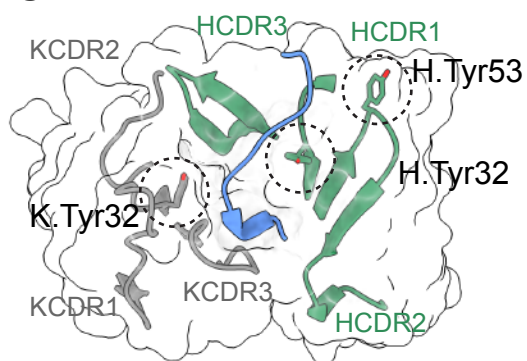

1210-KC **NANP<sub>5</sub>** 1210-HC 2E10.E9-KC **247-3** 2E10.E9-HC 2F2-KC **210-3** 2F2-HC

D

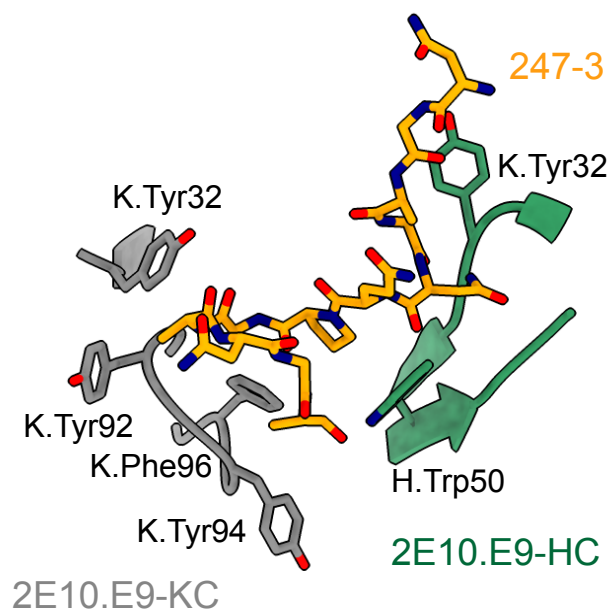

E

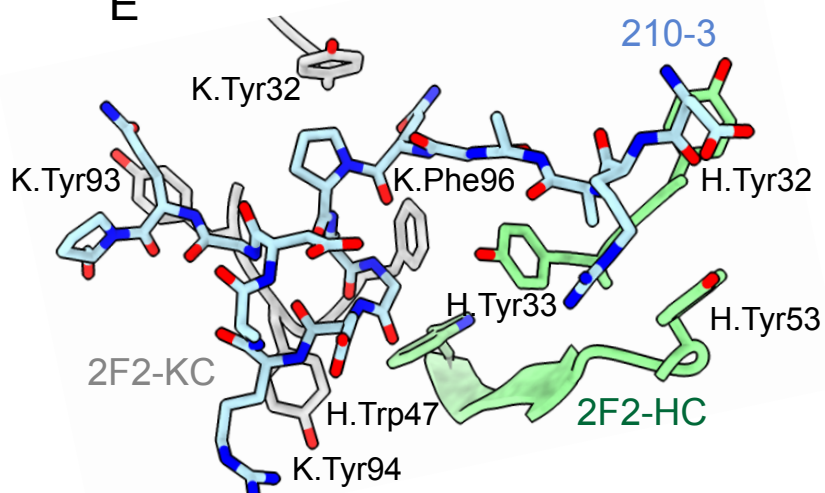

F

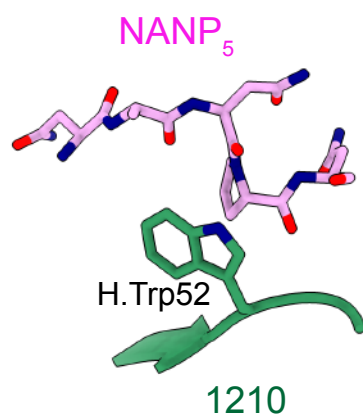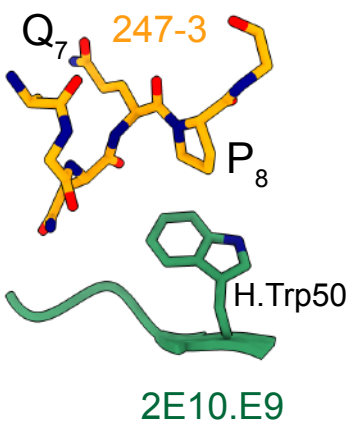

G

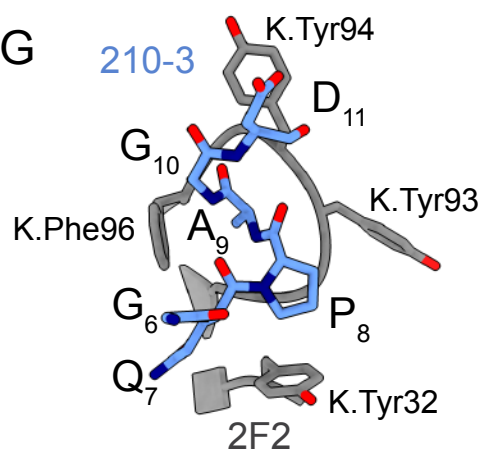

Supplement: supp [file elife-72908-supp-v1.zip]

A

2F2 Fab-210-3

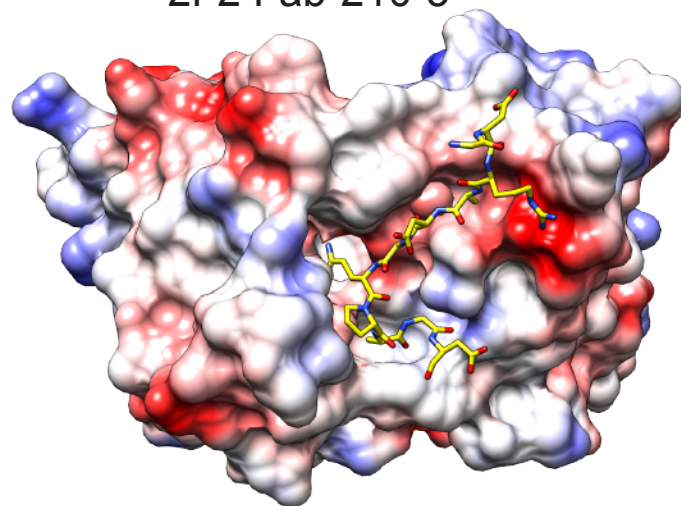

B

2E10.E9 Fab-247-3

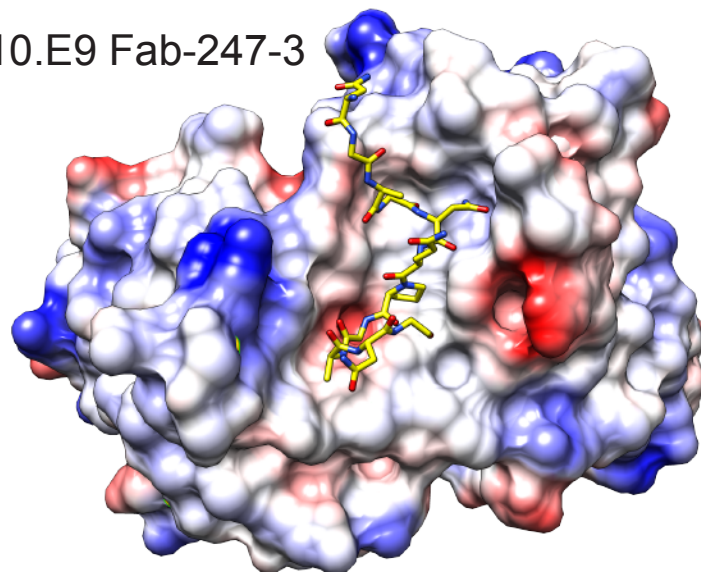

C

1210 Fab-NANP<sub>5</sub>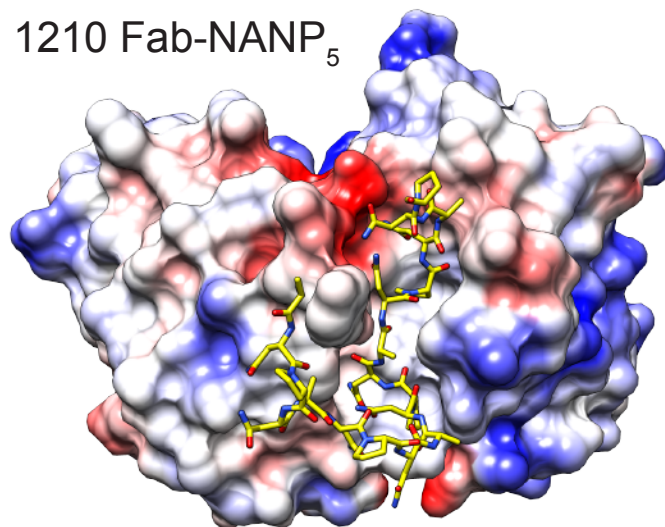

D

3D11 Fab-PbCSP

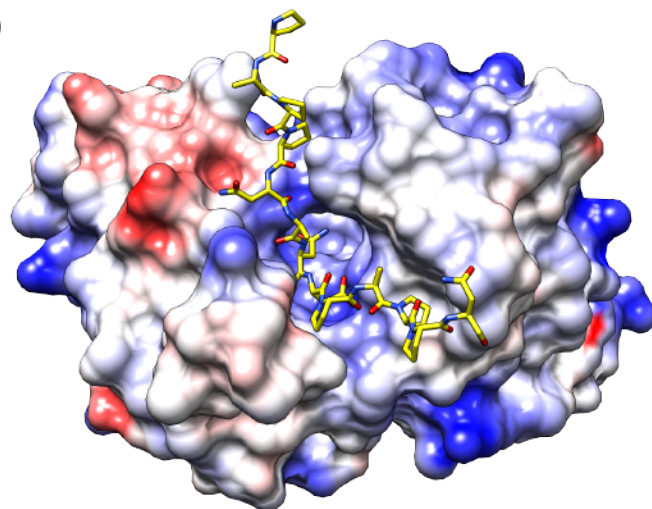

Supplement: supp [file elife-72908-supp-v1.zip]

A

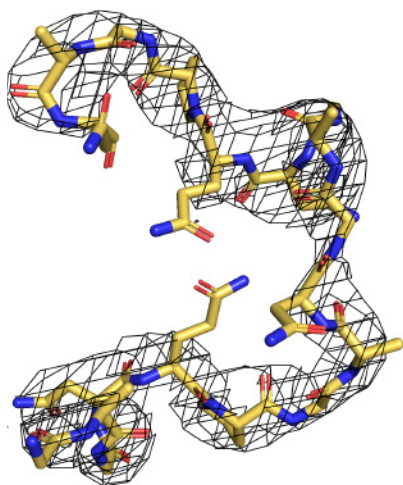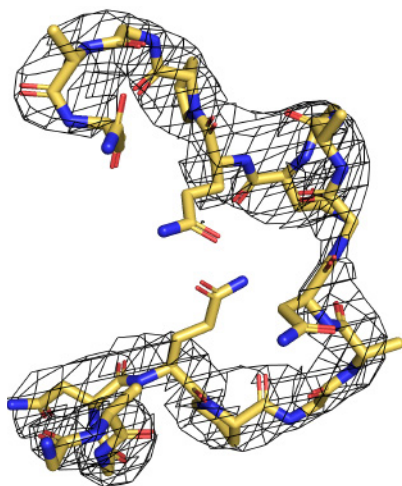

B

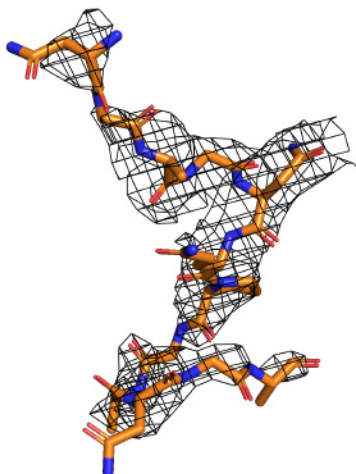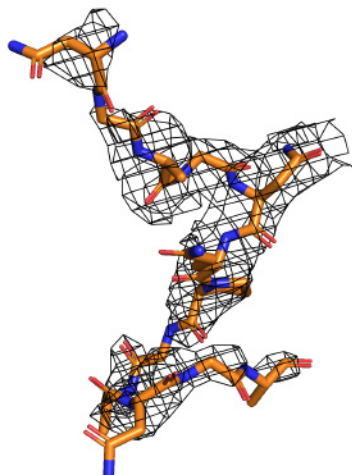

C

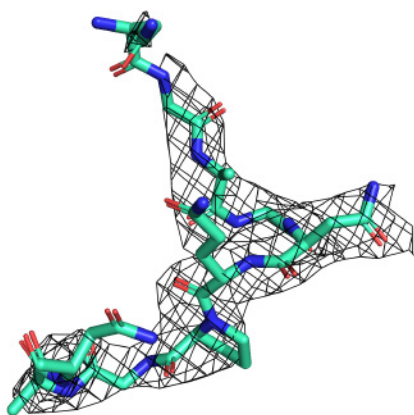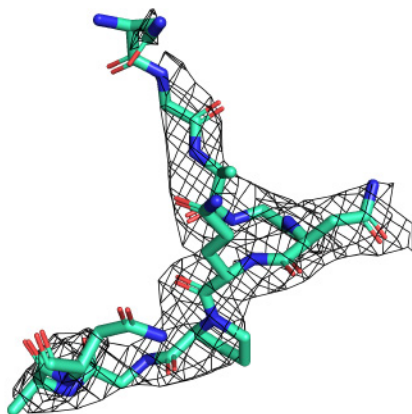

Supplement: supp [file elife-72908-supp-v1.zip]
